# Supplementary material for: Investigation of binding and activity of perfluoroalkyl substances to the human peroxisome proliferator-activated receptor β/δ
Source: Royal Society of Chemistry journal article supplement (doi:10.1039/c9em00218a), 2019-01-01
Supplement: c9em00218a1.pdf [file c9em00218a1.pdf]

## Supporting Information

### Investigation of binding and activity of perfluoroalkyl substances to human peroxisome proliferator-activated receptor $\beta/\delta$

Chuan-Hai Li<sup>1,2</sup>, Xiao-Min Ren<sup>1\*</sup>, Lin-Ying Cao<sup>1,2</sup>, Wei-Ping Qin<sup>1,2</sup>, Liang-Hong Guo<sup>1,2,3\*</sup>

<sup>1</sup>State Key Laboratory of Environmental Chemistry and Eco-toxicology, Research Center for Eco-environmental Sciences, Chinese Academy of Sciences, 18 Shuangqing Road, Beijing 100085, China

<sup>2</sup>College of Resources and Environment, University of Chinese Academy of Sciences, Beijing 100039, China

<sup>3</sup>The Third Affiliated Hospital of Guangzhou Medical University, Guangzhou 510150, China

Corresponding authors:

Email: [LHGuo@rcees.ac.cn](mailto:LHGuo@rcees.ac.cn) (Liang-Hong Guo)

Email: [xmren@rcees.ac.cn](mailto:xmren@rcees.ac.cn) (Xiao-Min Ren)

Address correspondence to Liang-Hong Guo, State Key Laboratory of Environmental Chemistry and Eco-toxicology, Research Center for Eco-environmental Sciences, Chinese Academy of Sciences, 18 Shuangqing Road, P.O. Box 2871, Beijing 100085, P. R. China. Telephone/Fax: 86 010 62849685. E-mail: [LHGuo@rcees.ac.cn](mailto:LHGuo@rcees.ac.cn) or Xiao-Min Ren, State Key Laboratory of Environmental Chemistry and Ecotoxicology,

Research Center for Eco-Environmental Sciences, Chinese Academy of Sciences, 18  
Shuangqing Road, Beijing 100085, P. R. China. Telephone: 86 010 62849338. Email:  
[xmren@rcees.ac.cn](mailto:xmren@rcees.ac.cn)

Number of pages: 11

**Contents:**

**Part 1: Methods**

The text includes details of chemicals, cell culture and cytotoxicity assay for HEK 293 cells, PPAR $\beta/\delta$  mediated luciferase reporter assay.

**Part 2: 4 Figures**

Figure S1. Structures of 17 PFASs used in this study.

Figure S2. Direct fluorescence polarization binding curve of C1-BODIPY-C12 to human PPAR $\beta/\delta$ -LBD, and competitive binding curves of linoleic acid, and the relationship between human PPAR $\beta/\delta$ -LBD binding potency (showed as  $1/IC_{50}$ ) and carbon chain length of PFCAs.

Figure S3. The cytotoxicity of 17 PFASs on HEK 293 cells determined by WST-1 assay.

Figure S4. Molecular docking results of PFASs with PPAR $\beta/\delta$ .

**Part 3: 1 Table**

Table S1. List of protein sequence used for human PPAR $\beta/\delta$  ligand binding domains protein synthesis.

## Methods

**Chemicals.** Seventeen perfluoroalkyl substances (PFASs) were used in this study, including twelve perfluorinated alkyl acids, [perfluorobutyric acid (PFBA, 98%), perfluorohexanoic acid (PFHxA,  $\geq 97\%$ ), perfluoroheptanoic acid (PFHpA, 99%), perfluorooctanoic acid (PFOA, 96%), perfluorononanoic acid (PFNA, 97%), perfluorodecanoic acid (PFDA, 98%), perfluoroundecanoic acid (PFUnA, 95%), perfluorododecanoic acid (PFDoA, 96%), perfluorotridecanoic acid (PFTrDA, 97%), perfluorotetradecanoic acid (PFTeDA, 97%), perfluorohexadecanoic acid (PFHxDA, 95%), perfluorooctadecanoic acid (PFOcDA, 97%)], three perfluorinated alkyl sulfonates [perfluorobutane sulfonate (PFBS, 97%), perfluorohexane sulfonate (PFHxS,  $\geq 98\%$ ), perfluorooctane sulfonate (PFOS,  $\geq 98\%$ )], and two perfluorinated telomere alcohols [6:2-fluorotelomer alcohol (6:2 FTOH, 97%) and 8:2-fluorotelomer alcohol (8:2 FTOH, 97%)]. PFHxDA, PFOcDA and PFOS were purchased from Alfa Aesar (Ward Hill, MA, USA). Others 14 PFASs were all obtained from Sigma-Aldrich (St. Louis, MO, USA). Human PPAR $\beta$ -LBD (with purity higher than 85%) was prepared by Zhongding Biotechnology Co. Ltd. (Nanjing, China). 4,4-Difluoro-5-methyl-4-bora-3a,4a-diaza-s-indacene-3-dodecanoic acid (C1-BODIPY-C12) probe was purchased from Life Technologies (Carlsbad, CA, USA). GW501516 and arachidonic acid (AA,  $\geq 98.5\%$ ) was purchased from Sigma-Aldrich (St. Louis, MO, USA). All other reagents were of analytical grade.

**Cell Culture and Cytotoxicity Assay.** Human HEK 293 embryonal kidney cells were cultured in high-glucose Dulbecco's minimal essential medium (DMEM)

supplemented with 10% fetal bovine serum (Life Technologies), 100 units/mL penicillin and 100  $\mu$ g/mL streptomycin (GIBCO, Grand Island, NY) in a humidified 5% CO<sub>2</sub> incubator at 37 °C. The cytotoxicity of HEK 293 cells was determined by WST-1 assay. Briefly,  $2 \times 10^4$  cells per well were seeded into 96-well plates. After 24 h, the cells were incubated with different concentration of PFASs (up to 500  $\mu$ M) for 24 h, and then incubation with cell proliferation reagent WST-1 (1:10 dilution) (Roche Applied Science, Penzberg, Germany) at 37 °C for two hours. The absorbance was measured at 480 nm using SpectraMax i3x Multi-mode detection platform (Molecular Devices, Sunnyvale, CA). The relative cell viability was presented using 0.1% DMSO as vehicle control.

**PPAR $\beta$ / $\delta$  Mediated Luciferase Reporter Assay.** A cell-based human PPAR $\beta$ / $\delta$ -driven luciferase reporter assay was performed by co-transfect pBIND-PPAR $\beta$ / $\delta$  vector, pGL4.35[luc2P/9XGAL4UAS/Hygro] vector and PRL-TK vector. The pBIND-PPAR $\beta$ / $\delta$  vector containing yeast Gal4 DNA-binding domain and PPAR $\beta$ / $\delta$ -ligand binding domain fusion genes were provided by GeneChem (Shanghai, China). The pBIND-PPAR $\beta$ / $\delta$  vector can induce the transcription of pGL4.35[luc2P/9XGAL4UAS/Hygro] vector (Promega, Madison, WI, USA) containing an upstream Gal4 upstream activator sequence (UAS) when activated by a ligand. A PRL-TK vector (Promega, Madison, WI, USA) was used as an internal control reporter. HEK 293 cells were seeded at a density of  $2 \times 10^5$  cells/well in 24-well plates and cultured until 90% confluence. Then they were transiently transfected with the pBIND-PPAR $\beta$ / $\delta$  vector (300 ng), pGL4.35[luc2P/9XGAL4UAS/Hygro]

vector (300 ng) and PRL-TK vector (300 ng). Twenty-four hours later, the wells were replaced with fresh medium containing tested compounds in different concentrations for another 24 h. The cells were then harvested and measured their luciferase activity using a dual-luciferase reporter assay kit (Promega) and normalized to the Renilla luciferase activities and then calculated as relative luciferase activities. All data points were performed at least three independent experiments.

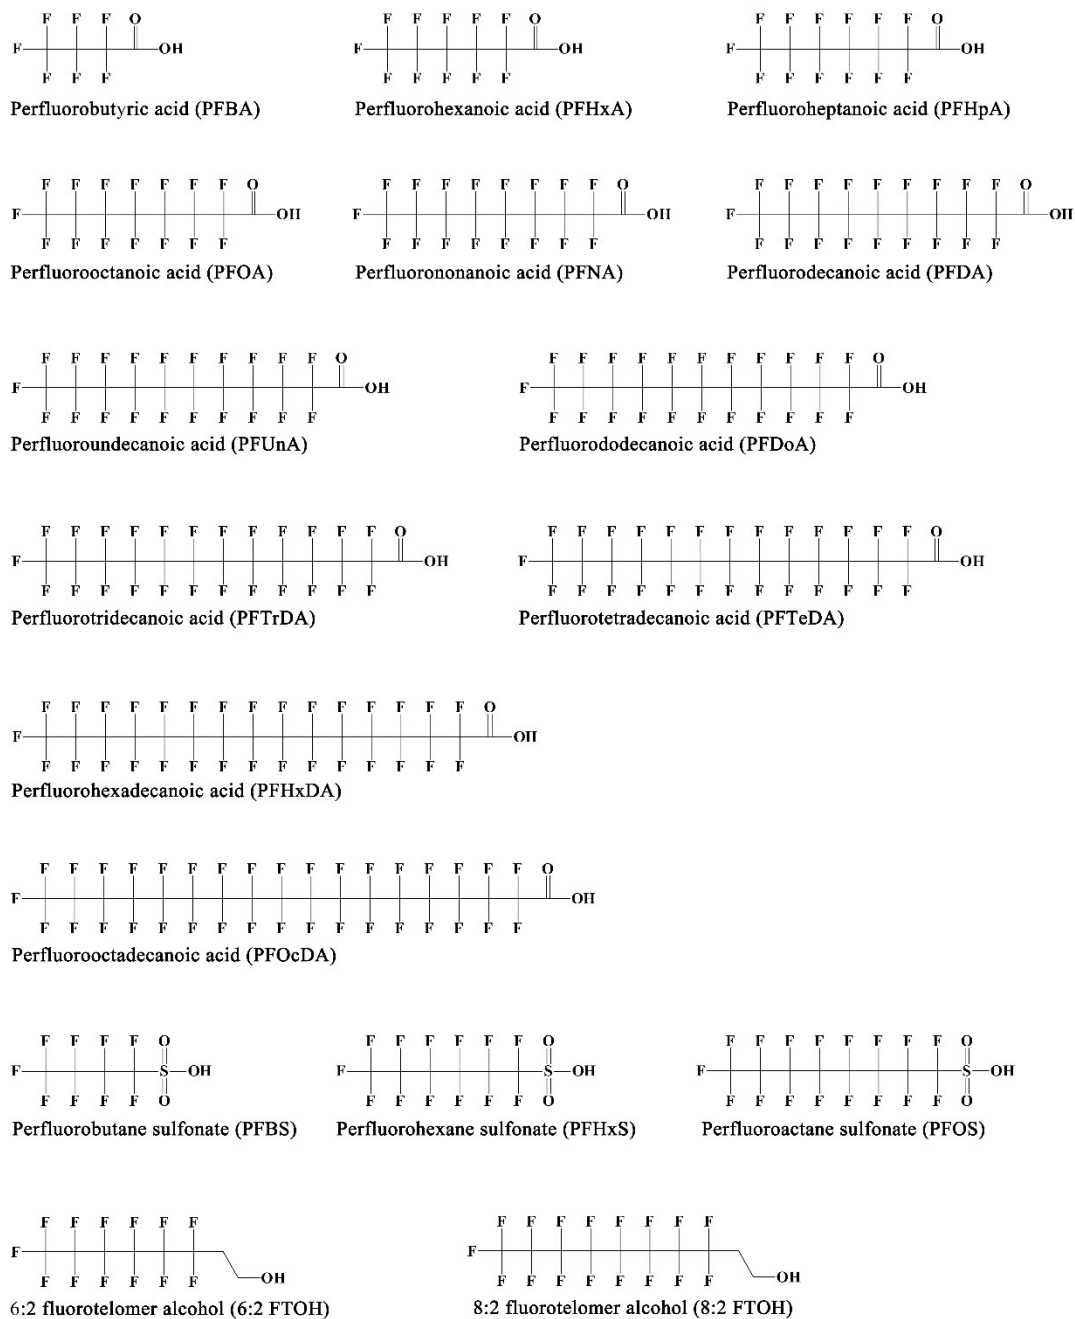

Figure S1. Structures of 17 PFASs used in this study.

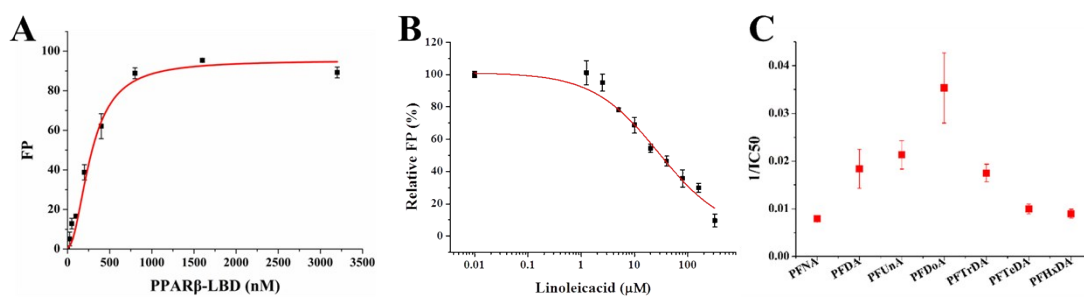

Figure S2. Direct fluorescence polarization binding curve of C1-BODIPY-C12 to human PPARβ/δ-LBD (A), and competitive binding curves of linoleic acid (B), and the relationship between human PPARβ/δ-LBD binding potency (shown as 1/IC<sub>50</sub>) and carbon chain length of PFCAs (C). The error bars represent the standard deviation of three measurements.



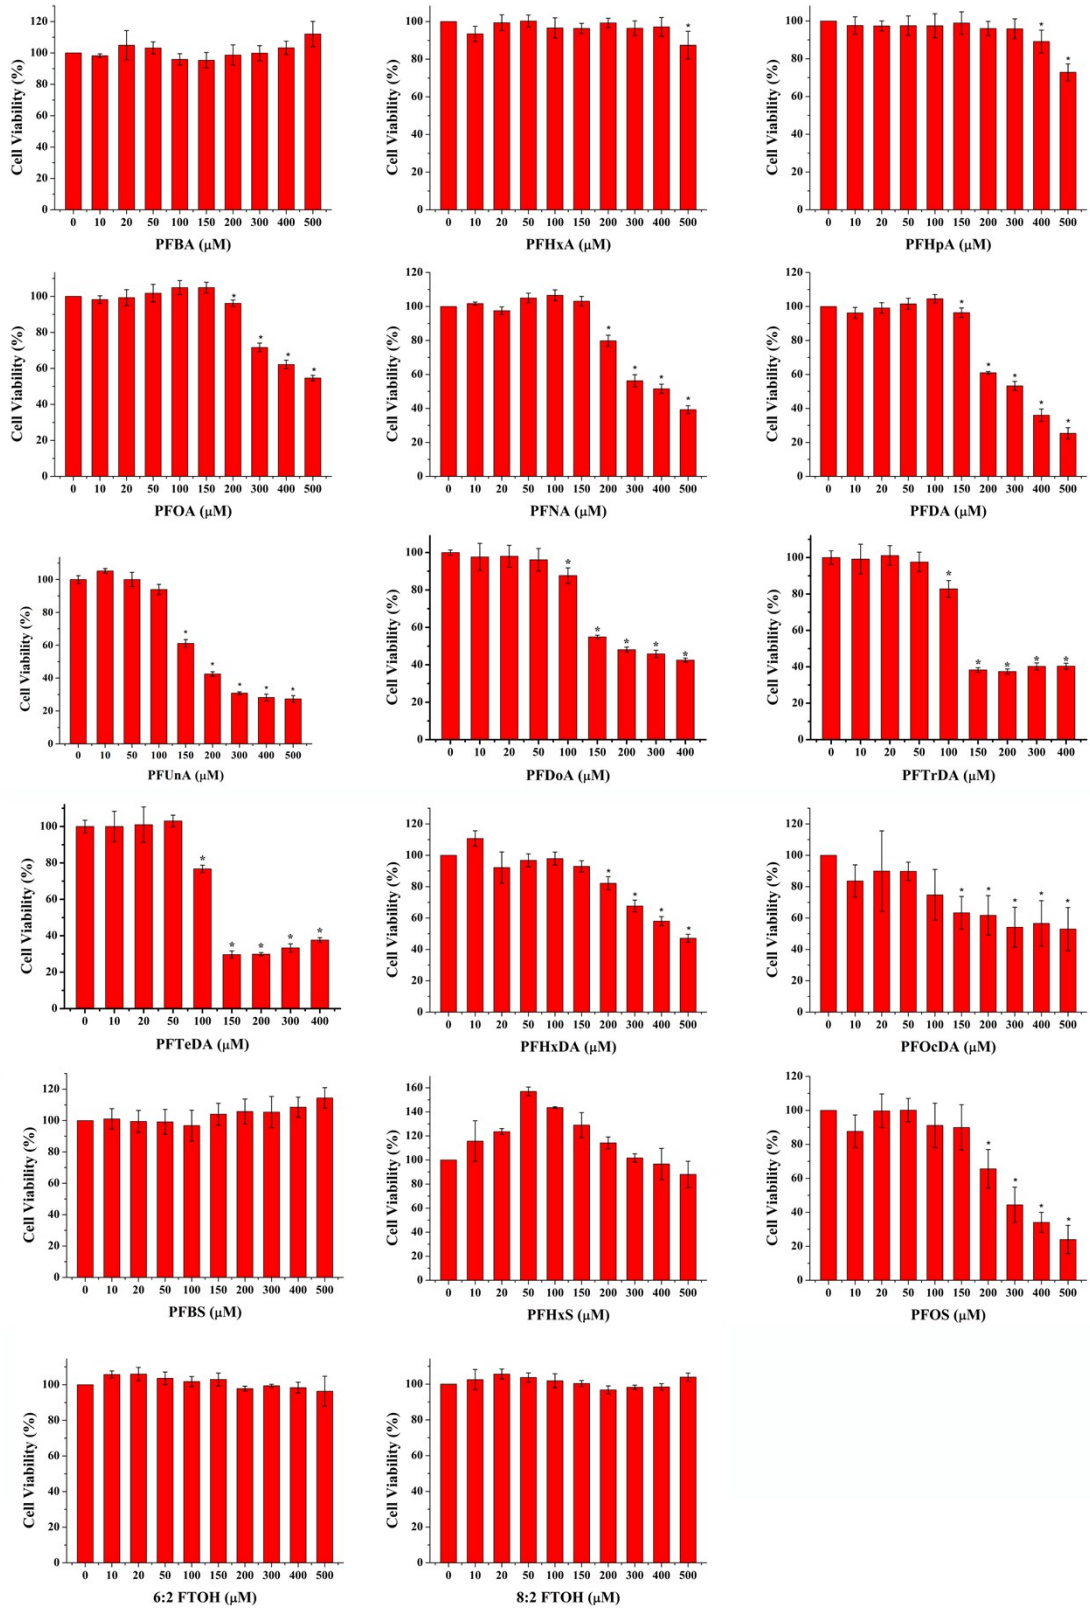

Figure S3. The cytotoxicity of 17 PFASs on HEK 293 cells determined by WST-1 assay.  $*P < 0.05$ , compare with the control group (0.1% DMSO).

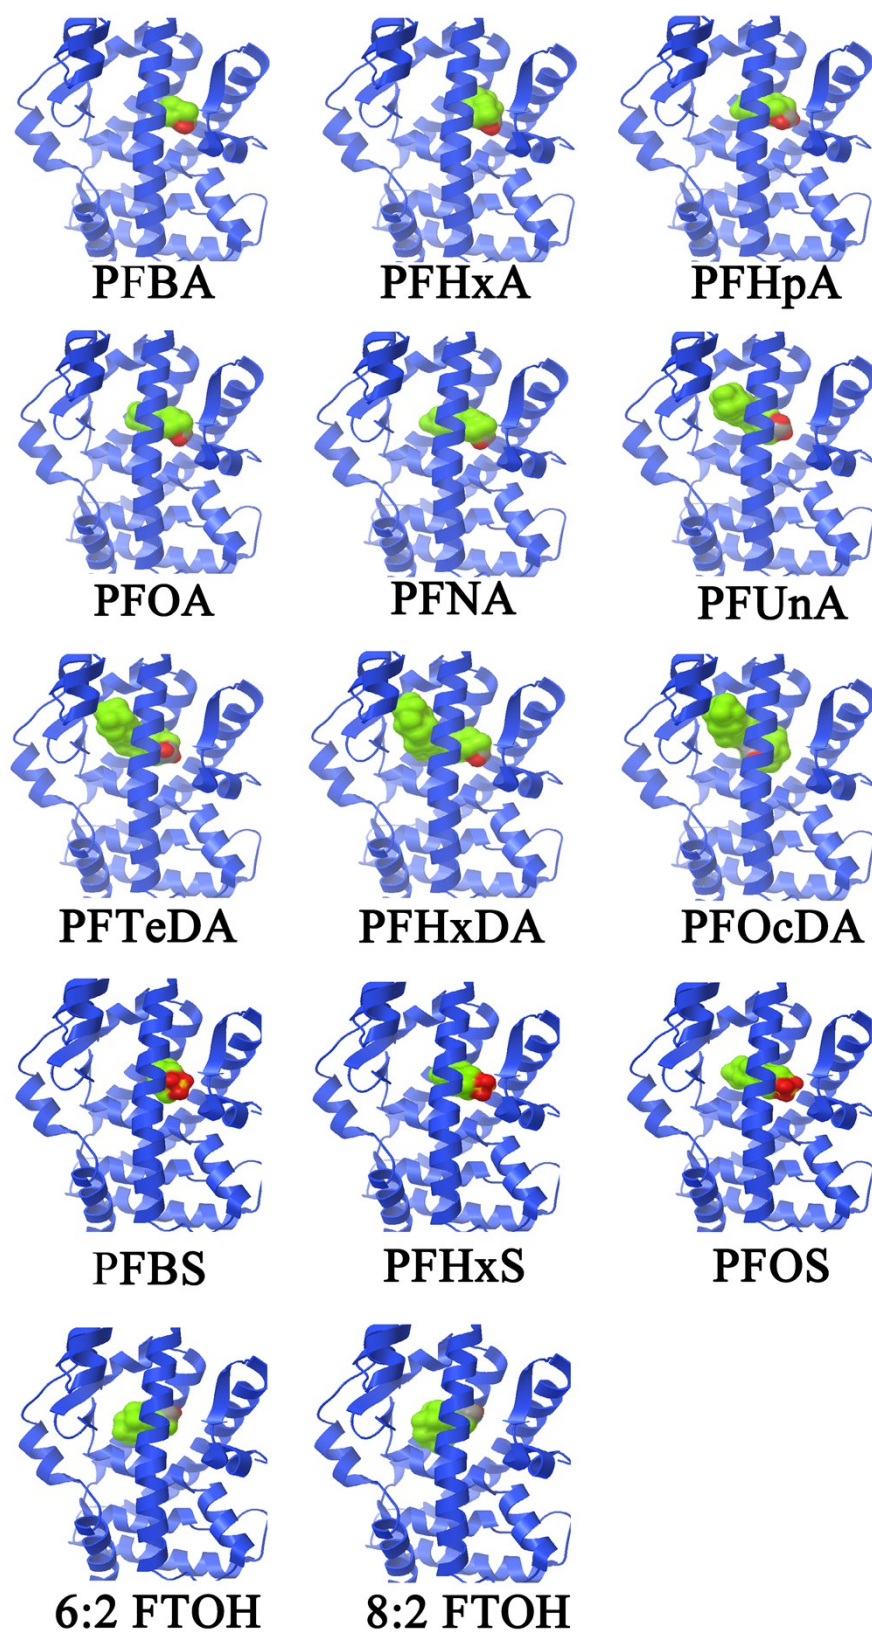

Figure S4. Molecular docking results of PFASs with human PPAR $\beta/\delta$ . PPAR $\beta/\delta$  are represented in blue, and the chemicals are colored by atom type (carbon in gray, oxygen in red, fluorine in green and sulfur in yellow).

Table S1. List of protein sequence used for human PPAR $\beta/\delta$  ligand binding domains protein synthesis.

| <b>Number</b>  | <b>Species</b> | <b>Amino Acids</b> | <b>Protein Sequence</b>                                                                                                                                                                                                                                                                                                                                                                                                                                                                                                         |
|----------------|----------------|--------------------|---------------------------------------------------------------------------------------------------------------------------------------------------------------------------------------------------------------------------------------------------------------------------------------------------------------------------------------------------------------------------------------------------------------------------------------------------------------------------------------------------------------------------------|
| NP_001165289.1 | Human          | 165-441            | meqpqeeape vreeeekeev aeaegapeln ggpqhalpss<br>sytdlsrsss ppslldqlqm gcdgascgsl nmecrvcgdk<br>asgfhygvha cegckgffrr tirmkleyek cersckiykk nrmkcqycrf<br>qkclalgmsh nairfgrmpe aekrklvagi tanegsqynp<br>qvadlkafsk hiynaylknf nmtkkkarsi ltgkashtap fvihdietlw<br>qaekglvwkq lvnglppyke isvhvfycq cttvetvrel tefaksipsf<br>sslfIndqvt llkygvheai famlasivnk dgllvangsg fvtreflrsl<br>rkpfsdiiip kfefavkfna lelddsdlal fiaaiilcgd rpglmnvprv<br>eaiqdtlra lefhlqanhp daqylfpkll qkmadlrqlv<br>tehaqmmqri kktetetslh pllqei ydkm y |
